# Supplementary material for: Fe3O4@SiO2 supported aza-crown ether complex cation ionic liquids: preparation and applications in organic reactions
Source: Royal Society of Chemistry journal article supplement (doi:10.1039/c6ra25291e), 2017-01-01
Supplement: c6ra25291e1.pdf [file c6ra25291e1.pdf]

Supporting Information

**Fe<sub>3</sub>O<sub>4</sub>@SiO<sub>2</sub> supported *aza*-crown ether complex cation ionic  
liquids: preparation and applications in organic reactions**

Dandan Li,<sup>a,c</sup> Jinyuan Wang,<sup>a,c</sup> Fengjuan Chen,<sup>a</sup> Huanwang Jing<sup>\*a,b</sup>

Table of content

|                                                                                        |    |
|----------------------------------------------------------------------------------------|----|
| 1. TGA of catalysts <b>5a</b> and <b>5b</b> .....                                      | S2 |
| 2. IR spectra of modified magnetic particles <b>2,3,4</b> and catalyst <b>5a</b> ..... | S3 |
| 3. XRD and HRTEM of <b>5a</b> .....                                                    | S7 |
| 4. The TEM of used catalyst <b>5a</b> .....                                            | S8 |

## TGA of catalysts **5a** and **5b**

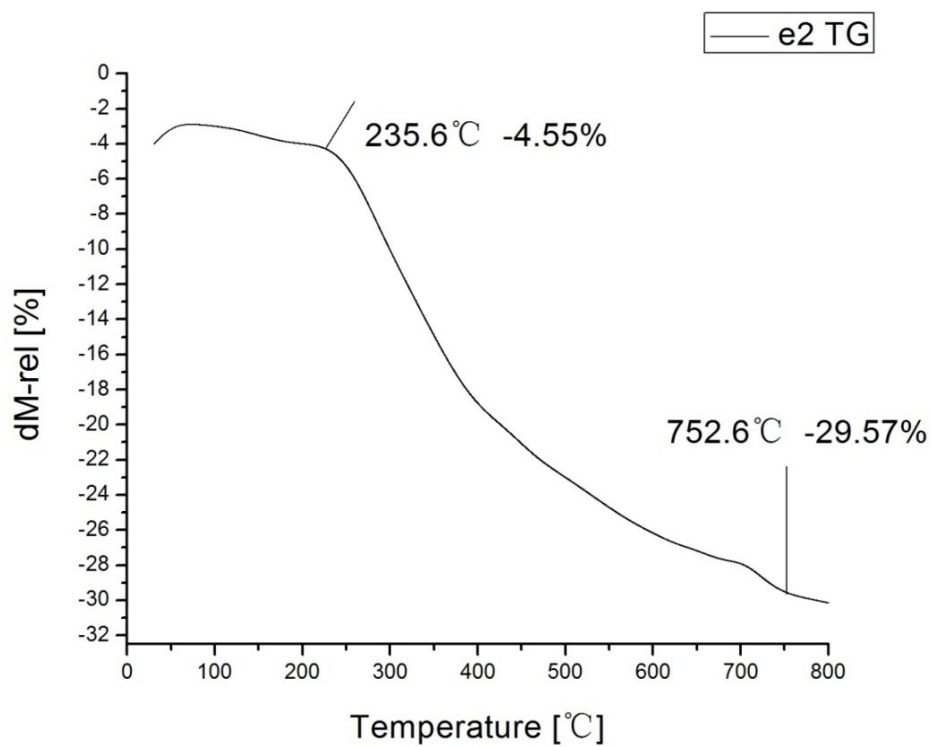

Fig. S1. The thermal gravity analysis **5a**

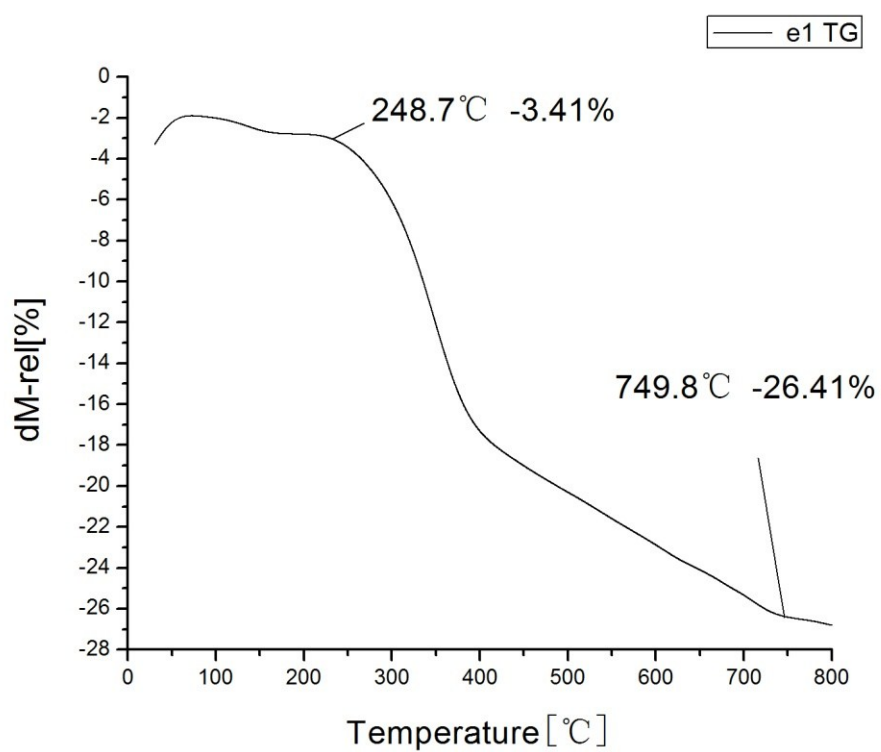

Fig. S2. The thermal gravity analysis **5b**

IR spectra of ILs

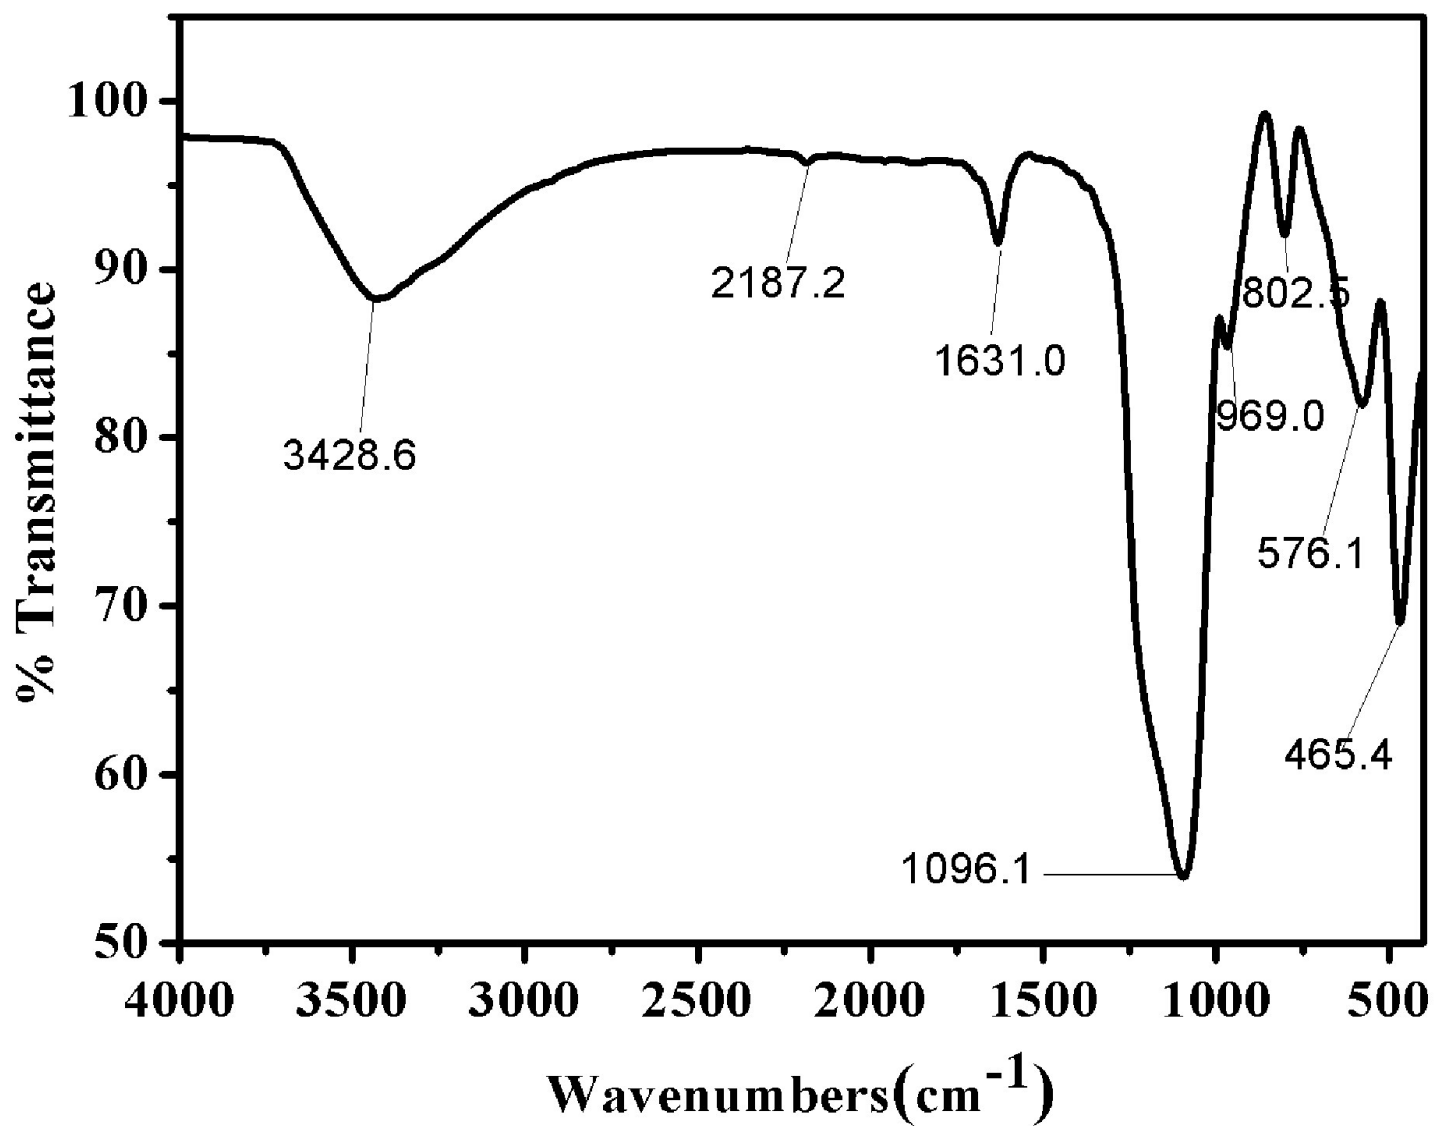

Fig. S3. Fe<sub>3</sub>O<sub>4</sub>@SiO<sub>2</sub> particles 2

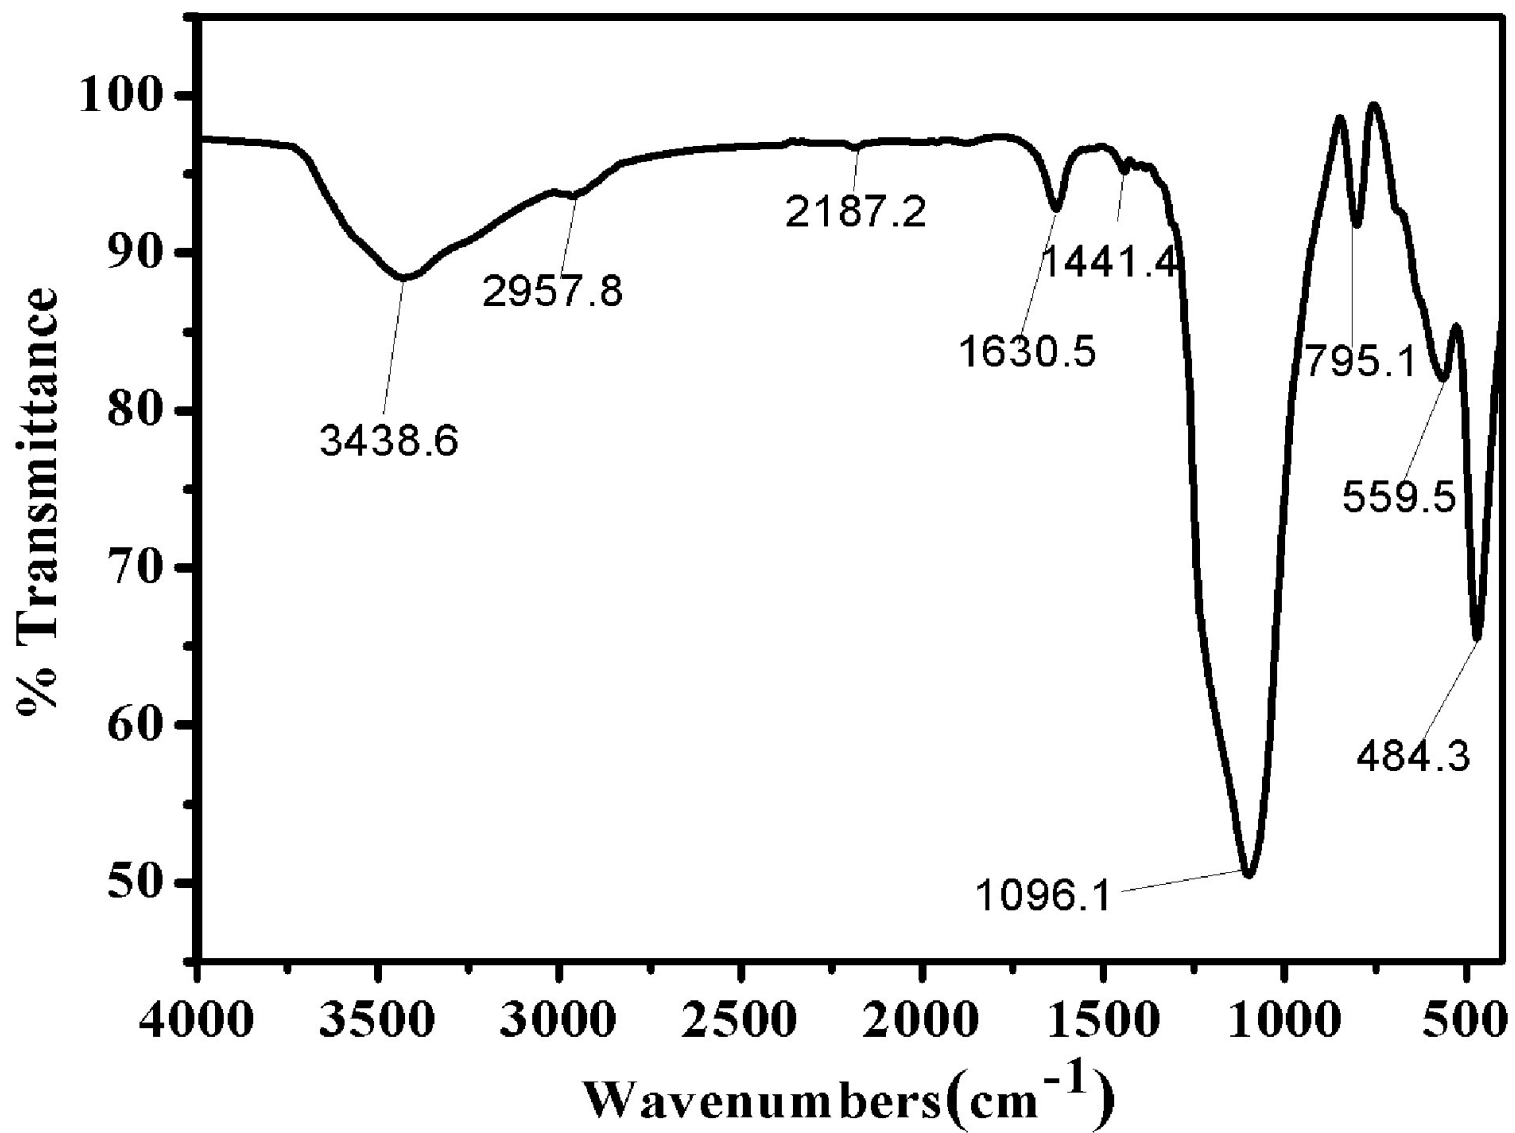

Fig. S4 Silane modified Fe<sub>3</sub>O<sub>4</sub>@SiO<sub>2</sub> particles 3

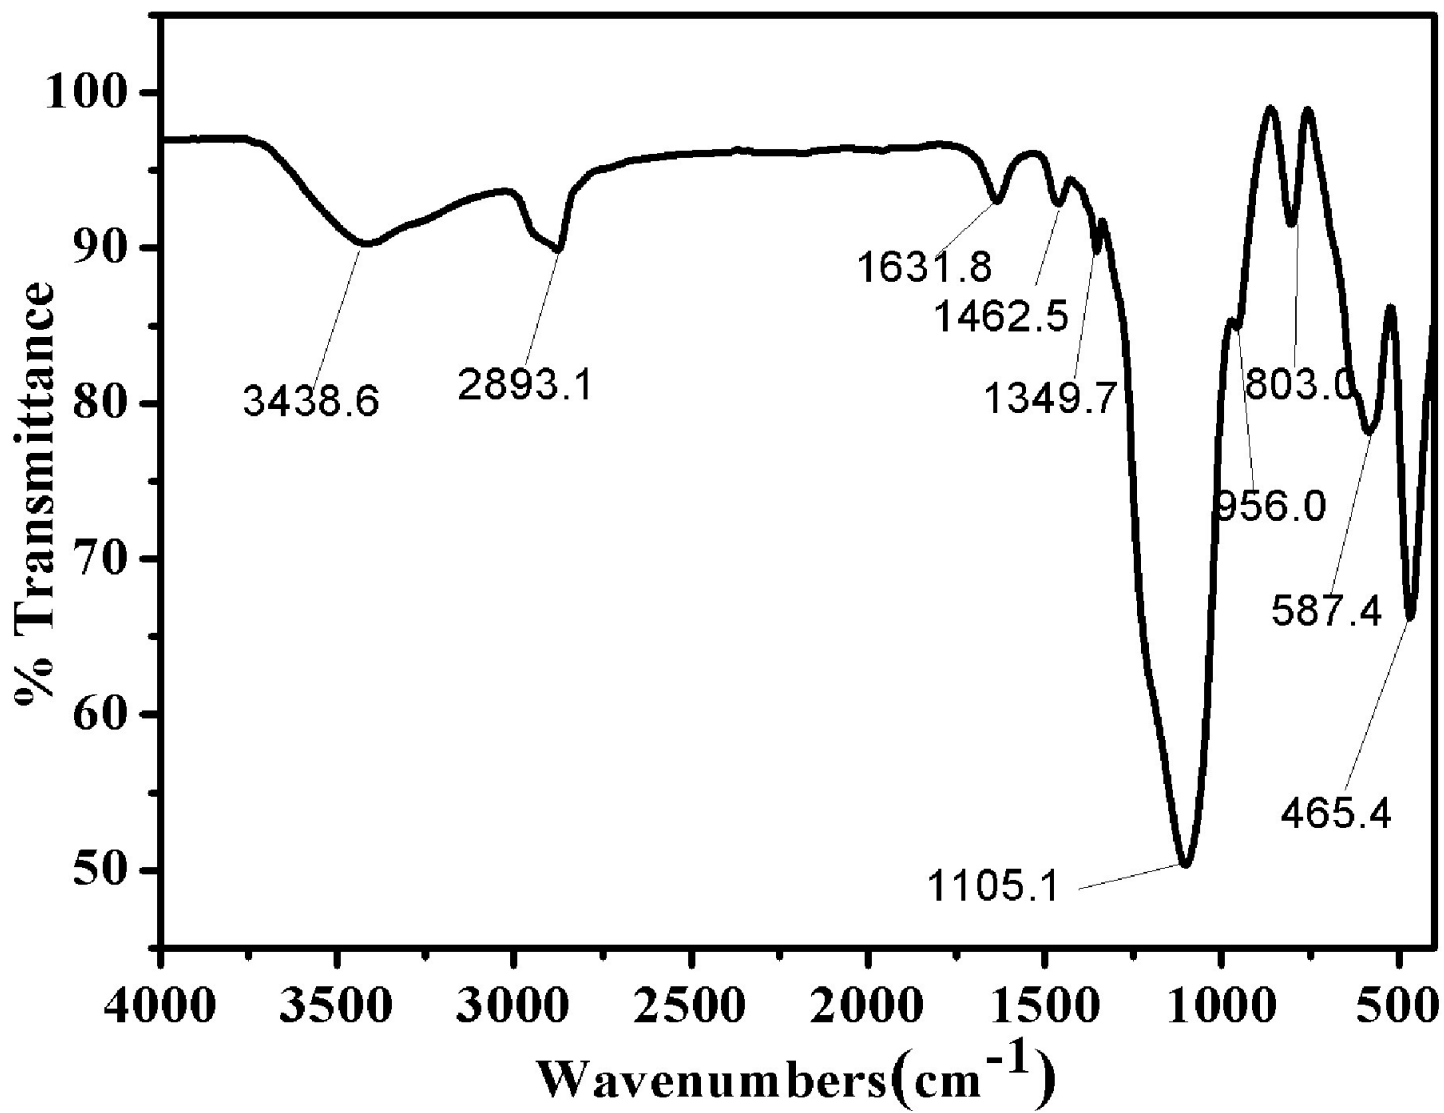

Fig. S5 *aza*-crown ether functionalized particles 4

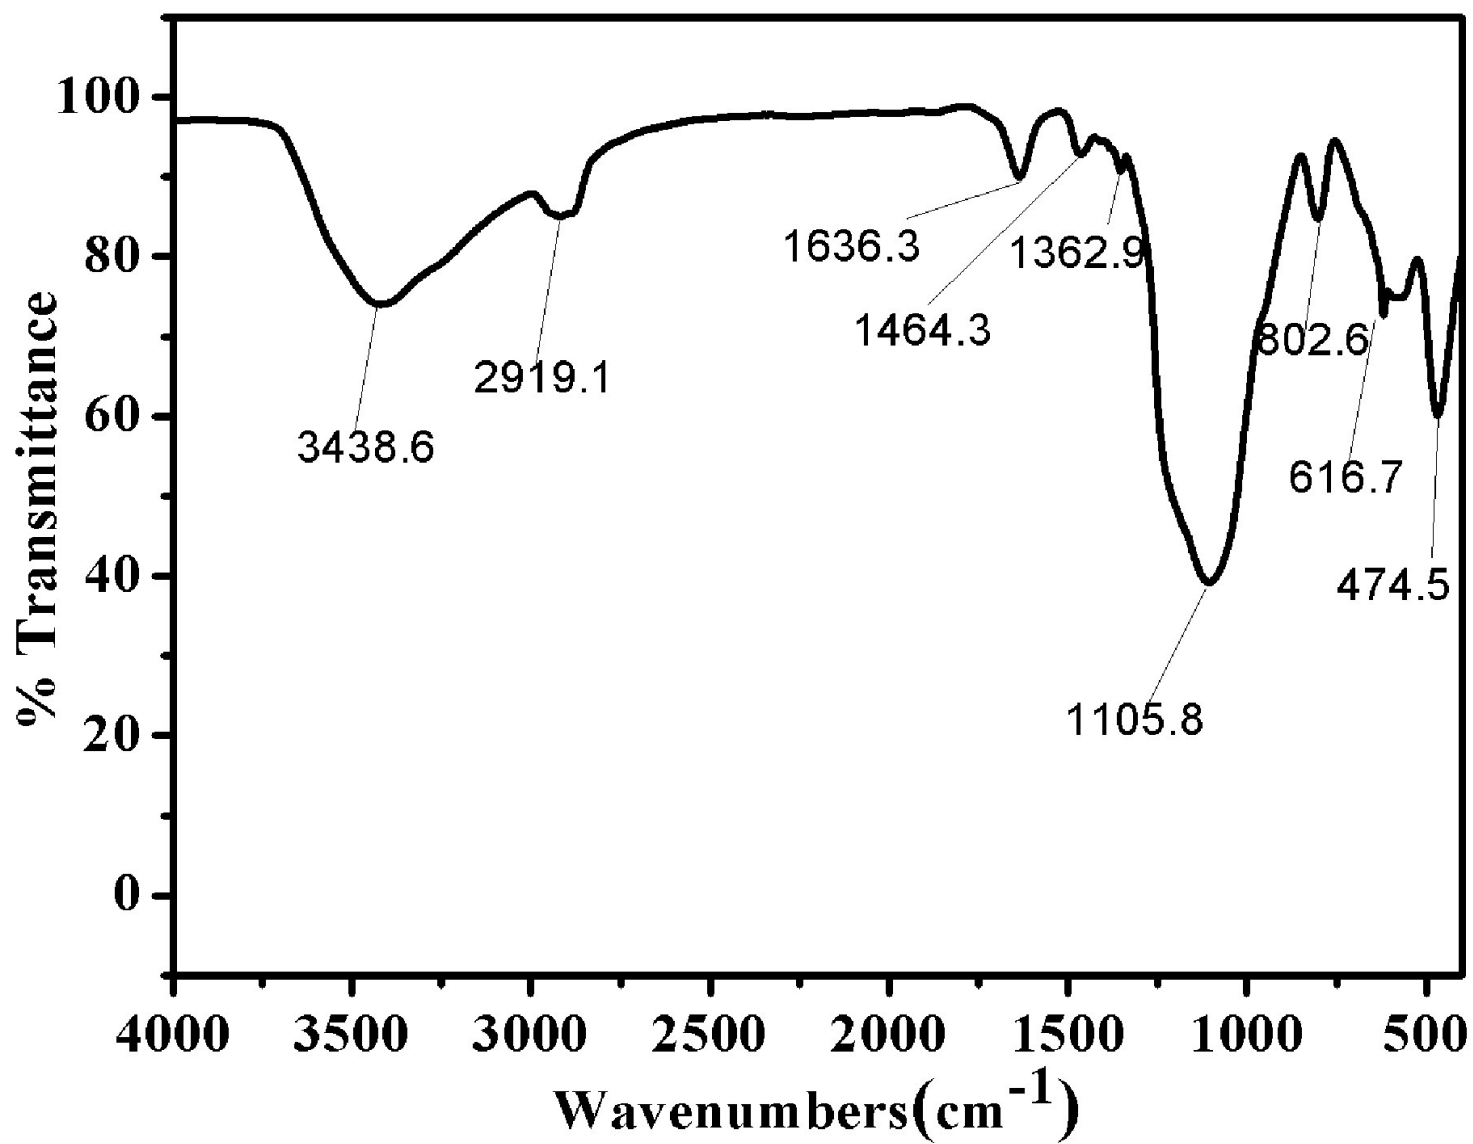

Fig. S6 Catalyst 5a

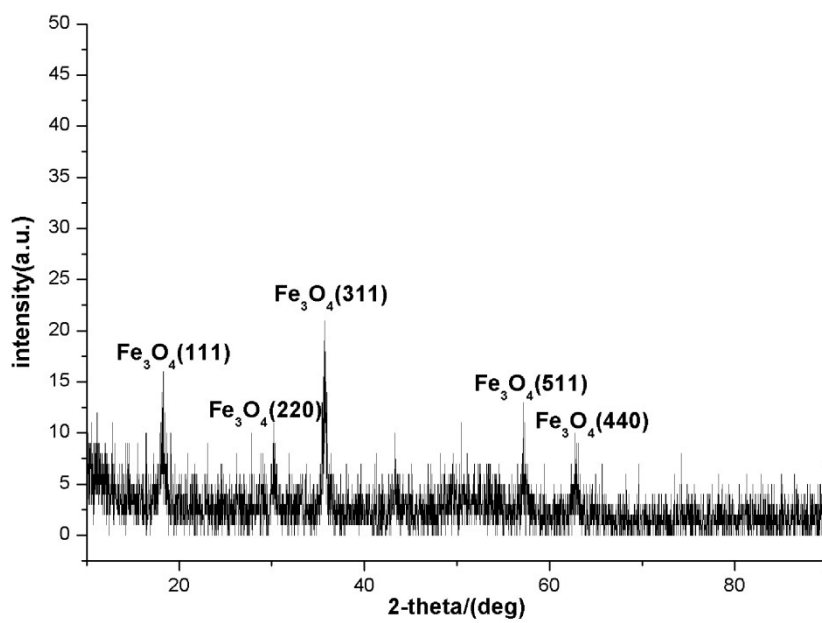

XRD of 5a

Fig. S7 XRD of 5a



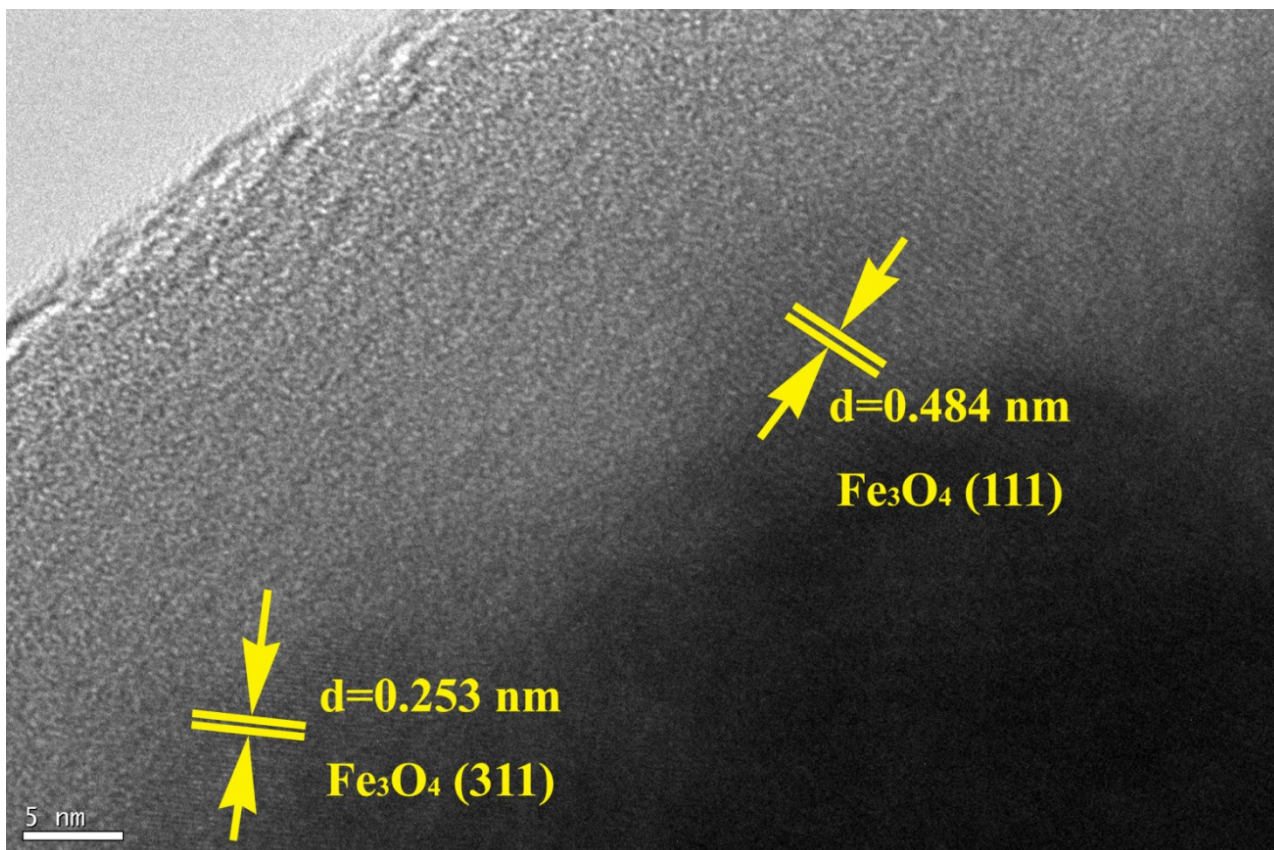

HRTEM of **5a**

Fig. S8 HRTEM of **5a**

The TEM of used catalyst **5a**

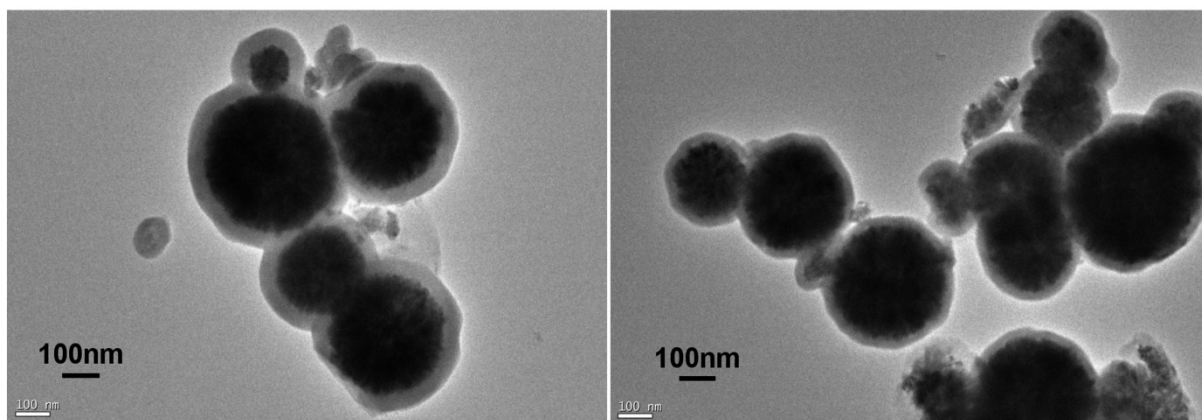

Fig. S9 TEM of used catalyst 5a
